# Supplementary material for: Meteorological ingredients of heavy precipitation and subsequent lake-filling episodes in the northwestern Sahara
Source: Copernicus journal article supplement (doi:10.5194/hess-29-1395-2025), 2025-03-17
Supplement: Supplementary file 1 [file hess-29-1395-2025-supplement.zip]

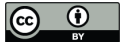

*Supplement of*

## **Meteorological ingredients of heavy precipitation and subsequent lake-filling episodes in the northwestern Sahara**

**Joëlle C. Rieder et al.**

*Correspondence to:* Moshe Armon ([moshe.armon@env.ethz.ch](mailto:moshe.armon@env.ethz.ch))

- [hess-29-1395-2025-supplement-title-page.pdf](#)
- [HPE\\_list\\_v2.txt](#)

The copyright of individual parts of the supplement might differ from the article licence.
